# Supplementary material for: Gut Microbiota-Derived Tryptophan Metabolites Modulate Inflammatory Response in Hepatocytes and Macrophages
Source: PubMed Central journal article supplement — Cell Rep. Author manuscript; Available in PMC 2019 Feb 27. (PMC6392449; doi:10.1016/j.celrep.2018.03.109), 2018-04-24
Supplement: NIHMS965665-supplement-1.pdf [file NIHMS965665-supplement-1.pdf]

**Cell Reports, Volume 23**

**Supplemental Information**

**Gut Microbiota-Derived Tryptophan Metabolites**

**Modulate Inflammatory Response**

**in Hepatocytes and Macrophages**

**Smitha Krishnan, Yufang Ding, Nima Saedi, Maria Choi, Gautham V. Sridharan, David H. Sherr, Martin L. Yarmush, Robert C. Alaniz, Arul Jayaraman, and Kyongbum Lee**

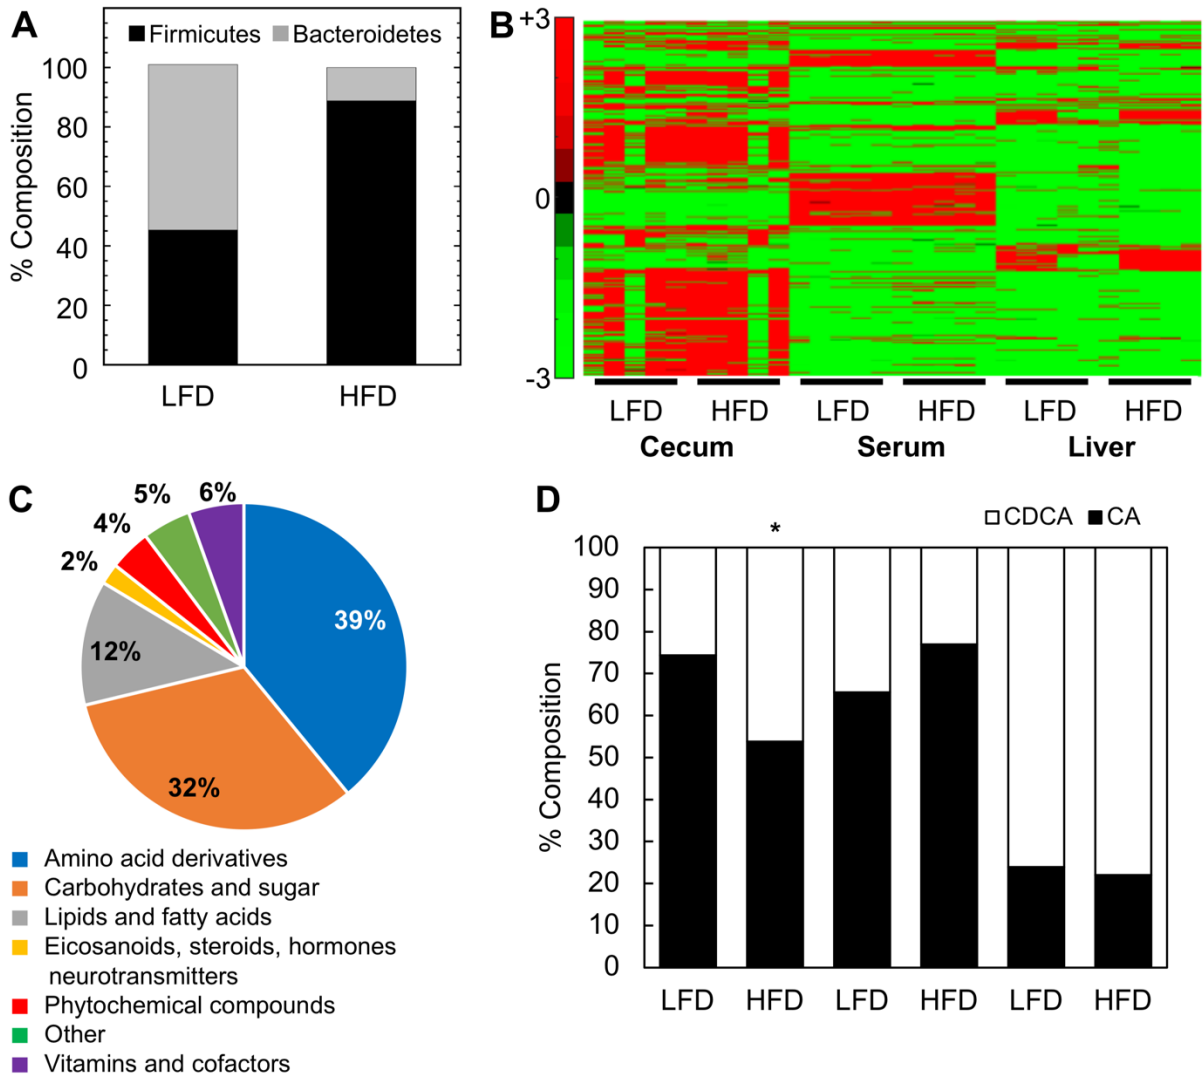

**Figure S1**, Effect of diet on microbiome and metabolite profile, related to Figure 2. Fecal material from mice fed a high-fat diet (HFD) or low-fat diet (LFD) were assayed for Firmicutes and Bacteroidetes using qRT-PCR (A). Ratios between the two phyla were determined from copy numbers calculated based on a DNA standard curve. Data shown are averages of  $n = 5$  mice. Error bars represent one standard deviation. \*:  $p < 0.05$  compared to LFD using Wilcoxon rank-sum test. Heat map shows hierarchically clustered LC-MS features (i.e., metabolites) detected in cecum, liver, and serum samples (B). Features from cecum, serum, and liver samples were separately scaled prior to clustering using the Pareto method. Red or green color denotes a feature that is elevated or depleted, respectively, relative to the mean value for the feature in the tissue compartment. Features significantly elevated or depleted were annotated and mapped to pathways cataloged in KEGG (C). Primary bile acid composition showing contribution from cholic acid (CA) and chenodeoxycholic acid (CDCA) (D).

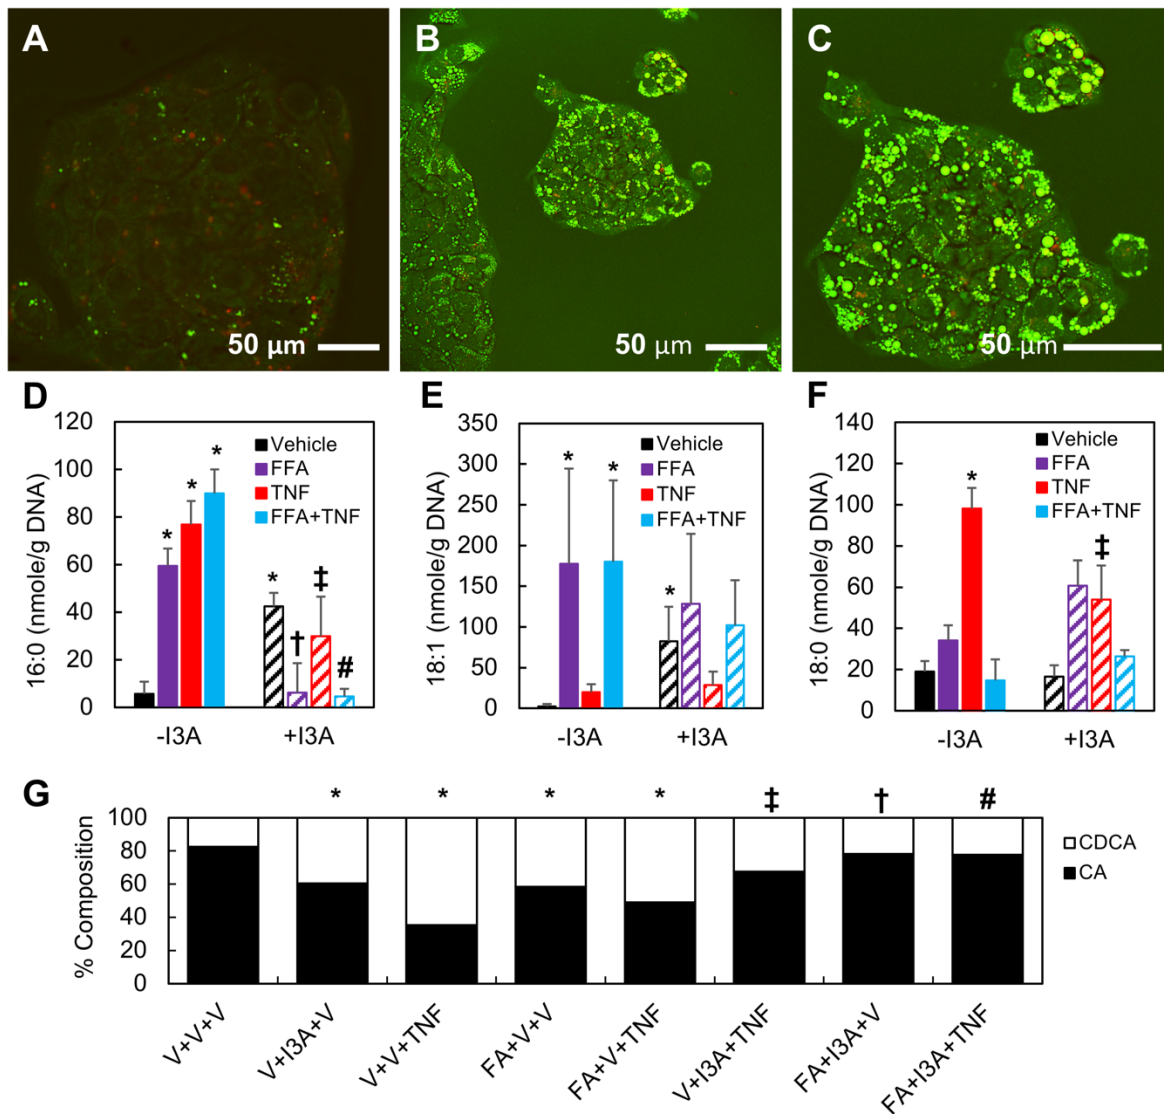

**Figure S2**, I3A attenuates TNF $\alpha$ -induced alterations in free fatty acid (FA) and bile acid (BA) metabolism in cultured HepG2 cells, related to Figures 5 and 6. Micrographs of HepG2 cells obtained using Coherent anti-Stokes Raman Scattering (CARS) microscopy (A-C). The cells were treated with either (A) vehicle or (B) a combination of palmitic (500  $\mu$ M) and oleic acids (500  $\mu$ M) for 48 hours. The microscope was tuned to detected aliphatic C-H vibrations. Lipid inclusion bodies show as green circles. Metabolites were extracted from cell cultures using a solvent-based method and analyzed using a product ion scan experiment for FFAs and BAs. The three most abundant FFAs were palmitic (D), oleic (E), and stearic (F) acids. Composition of primary BAs shown as a ratio of cholic acid (CA) to chenodeoxycholic acid (CDCA) (G). Data shown are averages of 4 independent experiments, each with 6 biological replicates. Treatment group means were compared using two-tailed Student *t*-test. \*:  $p < 0.05$  compared to negative vehicle control (V+V+V), †:  $p < 0.05$  compared to the corresponding FFA supplementation group (FA+V+V), ‡:  $p < 0.05$  compared to the corresponding TNF $\alpha$  treatment group (V+V+TNF), #:  $p < 0.05$  compared to combined FFA supplementation and TNF $\alpha$  treatment (FA+V+TNF).

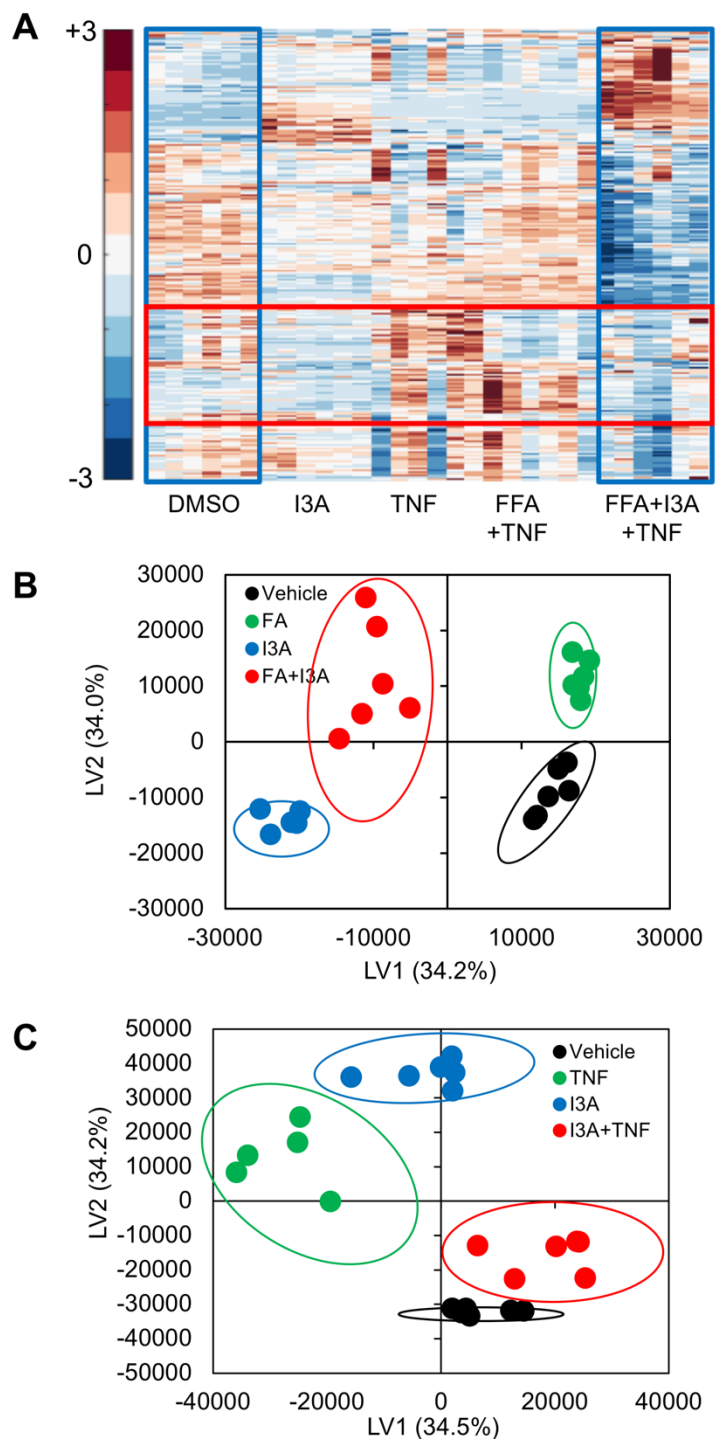

**Figure S3**, Multivariate analysis of untargeted metabolomics data from AML12 cultures, related to Figure 6. LC-MS data features were pareto-scaled and hierarchically clustered (A) for qualitative comparisons between the effects of TA and I3A on global metabolite profile. The similarity of the metabolite profiles was assessed based on group centroid distances using PLS-DA (B-C). Ellipses show 95% confidence intervals for each group. Numbers in parentheses show % of variance in the data explained by the latent variable (LV).

**Table S1**, Parameters for product ion scan and IDA experiments, related to Figures 1, 2, 3, 6 and 7.

|                                                                      | <b>Bile Acid Method</b>                                                                     | <b>Free Fatty Acid Method</b>                                                                                     | <b>Hydrophilic Interaction Liquid Chromatography (HILIC)</b>                         |
|----------------------------------------------------------------------|---------------------------------------------------------------------------------------------|-------------------------------------------------------------------------------------------------------------------|--------------------------------------------------------------------------------------|
| <b>Column</b>                                                        | Kinetex® 5 µm EVO C18 100 Å, 50 x 2.1 mm                                                    | Luna® 5 µm C8(2) 100 Å, 150 x 4.6 mm                                                                              | Luna® 5 µm NH2 100 Å, 250 x 2 mm                                                     |
| <b>Solvent A</b>                                                     | 50:50 v/v water:methanol with 0.1% w/v NH <sub>4</sub> OH and 10 mM ammonium acetate        | 97:3 v/v water:methanol with 10 mM tributylamine and 15 mM acetic acid                                            | 95:5 v/v water:acetonitrile with 20 mM ammonium acetate and 20 mM NH <sub>4</sub> OH |
| <b>Solvent B</b>                                                     | Methanol with 0.1% w/v NH <sub>4</sub> OH and 10 mM ammonium acetate                        | Methanol                                                                                                          | Acetonitrile                                                                         |
| <b>pH Solvent A</b>                                                  | 9                                                                                           | 4.5                                                                                                               | 9.45                                                                                 |
| <b>pH Solvent B</b>                                                  | 9                                                                                           | N/A                                                                                                               | N/A                                                                                  |
| <b>Column Temperature (°C)</b>                                       | 50                                                                                          | 25                                                                                                                | 25                                                                                   |
| <b>Injection volume (µL); Draw speed (µL/min); Flowrate (µL/min)</b> | 10; 200; 200                                                                                | 10; 300; 300                                                                                                      | 10; 300; 300                                                                         |
| <b>MS Method</b>                                                     | Product Ion Scan                                                                            | Product Ion Scan                                                                                                  | IDA                                                                                  |
| <b>Source (Ionization Mode)</b>                                      | ESI (-)                                                                                     | ESI (-)                                                                                                           | ESI (+)                                                                              |
| <b>Calibration Solution</b>                                          | 1 µM cholate, chenodeoxycholate, taurocholate, and glycocholate in 50:50 v/v water:methanol | 0.01 mg/mL palmitic, oleic, stearic, palmitoleic, linoleic, and myristic acid in 0.01% v/v chloroform in methanol | Pos PPG Solution (AB Sciex)                                                          |
| <b>Source Gas 1</b>                                                  | 40                                                                                          | 60                                                                                                                | 35                                                                                   |
| <b>Source Gas 2</b>                                                  | 35                                                                                          | 60                                                                                                                | 45                                                                                   |
| <b>Curtain Gas</b>                                                   | 25                                                                                          | 25                                                                                                                | 25                                                                                   |
| <b>Source Temperature (°C)</b>                                       | 450                                                                                         | 550                                                                                                               | 450                                                                                  |
| <b>TOF MS Collison Energy (V)</b>                                    | -10                                                                                         | -5                                                                                                                | +5                                                                                   |
| <b>Declustering Potential (V)</b>                                    | -100                                                                                        | -100                                                                                                              | 80                                                                                   |

**Table S2**, Collision energies (CE) and expected retention times (RT) for target product ions, related to Figures 2, 3, 6, and 7.

| Metabolite            | LC/MS Method    | Collision Energy (V) | Expected RT (min) |
|-----------------------|-----------------|----------------------|-------------------|
| Cholic acid           | Bile Acid       | -30                  | 0.6               |
| Chenodeoxycholic acid | Bile Acid       | -30                  | 0.41              |
| Palmitic Acid         | Free Fatty Acid | -25                  | 25.2              |
| Oleic Acid            | Free Fatty Acid | -25                  | 26.02             |
| Stearic Acid          | Free Fatty Acid | -25                  | 27.74             |
| Palmitoleic Acid      | Free Fatty Acid | -25                  | 23.44             |
| Indole-3-acetate      | HILIC           | +25 (IDA)            | 16.7              |
| Tryptamine            | HILIC           | +25 (IDA)            | 3.4               |

**Table S3**, LC method for bile acid assay, related to Figure 6.

| Time (min) | Flowrate (uL/min) | %A  | %B  |
|------------|-------------------|-----|-----|
| 0.50       | 500               | 100 | 0   |
| 4.50       | 500               | 50  | 50  |
| 5.50       | 500               | 0   | 100 |
| 6.50       | 500               | 100 | 0   |

**Table S4**, LC method for free fatty acid assay, related to Figures 3, 6, and 7.

| Time (min) | Flowrate (uL/min) | %A | %B |
|------------|-------------------|----|----|
| 0          | 300               | 20 | 80 |
| 20         | 300               | 1  | 99 |
| 40         | 300               | 1  | 99 |
| 41         | 300               | 20 | 80 |
| 50         | 300               | 20 | 80 |

**Table S5**, LC method for IDA experiments, related to Figures 1 and 2.

| Time (min) | Flowrate (uL/min) | %A  | %B |
|------------|-------------------|-----|----|
| 0          | 300               | 15  | 85 |
| 15         | 300               | 100 | 0  |
| 28         | 300               | 100 | 0  |
| 30         | 300               | 15  | 85 |
| 60         | 300               | 15  | 85 |

**Table S6**, Primer sequences for qRT-PCR analysis, related to Figures 4 and 7.

| <b>Gene</b>    | <b>Forward Primer Sequence</b> | <b>Reverse Primer Sequence</b> |
|----------------|--------------------------------|--------------------------------|
| $\beta$ -actin | GGCTGTATTCCCCTCCATCG           | CCAGTTGGTAACAATGCCATGT         |
| TNF $\alpha$   | TCTCATGCACCACCATCAAGGACT       | TGACCACTCTCCCTTTGCAGAACT       |
| MCP-1          | CTCTCTCCTCCACCACCAT            | ACTGCATCTGGCTGAGCCA            |
| IL-1 $\beta$   | TCCAGGATGAGGACATGAGCAC         | GAACGTCACACACCAGCAGGTTA        |
| Fas            | TACCAGTGCCACAGGAGTCTCA         | TAAACACCTCGTCGATTTTCG TTC      |
| SREBP-1c       | CTCCAAGGTTTCGTCTGACG           | TCCAGTGGCAAAGAAACACC           |
| Ahr            | CGCGGGCACCATGAGCAG             | GAGACTCAGCTCCTGGATGG           |
| Cyp7a1         | CCTTGGACGTTTTCTCGCT            | GCGCTCTTTGATTTAGGAAG           |
| Cyp27a1        | TGCCTGGGTCGGAGGAT              | GAGCCAGGGCAATCTCATACTT         |
| GAPDH          | GAAGGTCGGTGTGAACGGATTTGGC      | TGTTGGGGGCCGAGTTGGGATA         |
| Bacteroidetes  | ACGCTAGCTACAGGCTTAACA          | ACGCTACTTGGCTGGTTCA            |
| Firmicutes     | GCGTGAGTGAAGAAGT               | CTACGCTCCCTTTACAC              |
